# Supplementary material for: Al2O3–Fe3O4–expanded graphite nano-sandwich structure for fluoride removal from aqueous solution
Source: Royal Society of Chemistry journal article supplement (doi:10.1039/c6ra19390k), 2016-01-01
Supplement: c6ra19390k1.pdf [file c6ra19390k1.pdf]

## Supporting Information

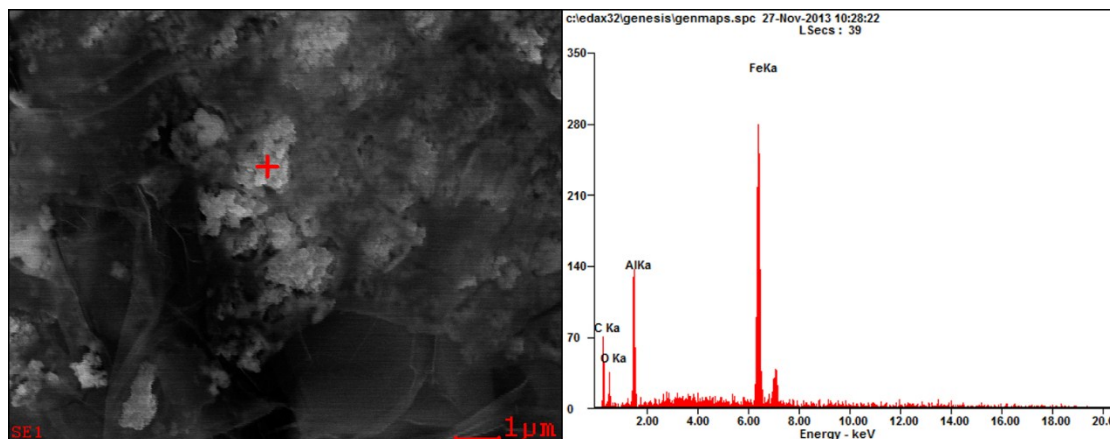

Fig. S1 The EDS spectra of  $\text{Al}_2\text{O}_3\text{-Fe}_3\text{O}_4\text{-EG}$

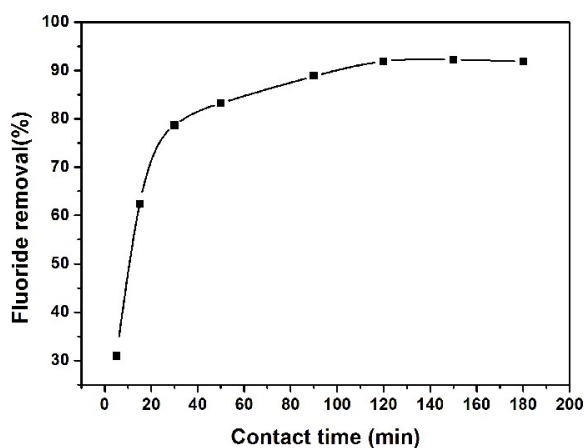

Fig. S2 The effect of contact time on fluoride removal efficiency of  $\text{Al}_2\text{O}_3\text{-Fe}_3\text{O}_4\text{-EG}$  at  $\text{pH}=4$ ,  $T=30\ ^\circ\text{C}$ ,  $m=0.2\ \text{g}$  and an initial fluoride concentration of  $5\ \text{mg/L}$  in  $50\ \text{mL}$  solution

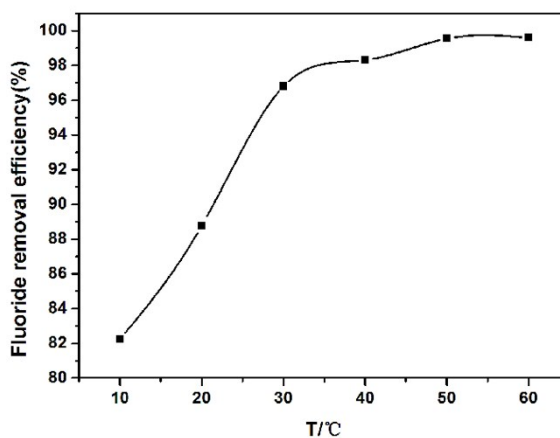

Fig. S3 The effect of temperature on fluoride removal efficiency of  $\text{Al}_2\text{O}_3\text{-Fe}_3\text{O}_4\text{-EG}$  at  $\text{pH}=4$ ,  $t=120\ \text{min}$ ,  $m=0.2\ \text{g}$  and an initial fluoride concentration of  $5\ \text{mg/L}$  in  $50\ \text{mL}$  solution

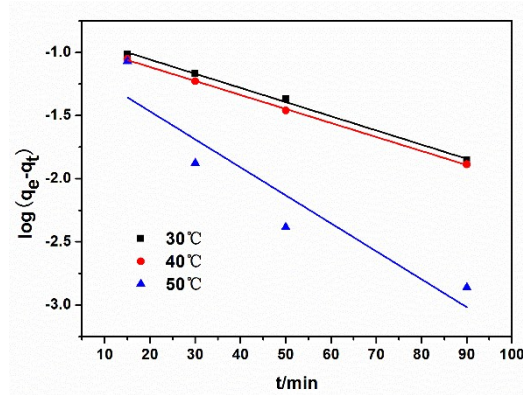

Fig. S4 Langmuir and Freundlich isotherm curves of fluoride adsorption on nano-sandwich at different temperatures

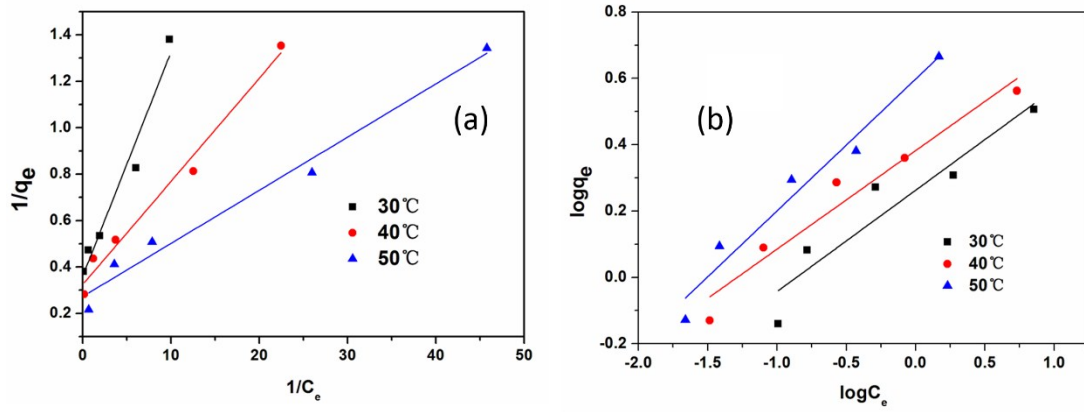

Fig. S5 Langmuir and Freundlich isotherm curves of fluoride adsorption on nano-sandwich at different temperatures
